# Supplementary material for: Regional Features of Long-Term Exposure to PM2.5 Air Quality over Asia under SSP Scenarios Based on CMIP6 Models
Source: Int J Environ Res Public Health. 2021 Jun 25;18(13):6817. doi: 10.3390/ijerph18136817 (PMC8297095; doi:10.3390/ijerph18136817)
Supplement: Supplementary file 1 [file ijerph-18-06817-s001.zip › ijerph-1251553-supplementary.pdf]

**Table S1:** Descriptions of the CMIP6 models used in this study [33]

| Model Name     | Horizontal Resolution                                                                      | Vert. levels (top level)       | Aerosol scheme                                                                   | Aerosol Species                                                                                                                                                                                                                                                                                        | Chemistry scheme                                                                                               |
|----------------|--------------------------------------------------------------------------------------------|--------------------------------|----------------------------------------------------------------------------------|--------------------------------------------------------------------------------------------------------------------------------------------------------------------------------------------------------------------------------------------------------------------------------------------------------|----------------------------------------------------------------------------------------------------------------|
| UKESM1-0-LL    | 1.25° x 1.875°                                                                             | L85 (85 km)                    | GLOMAP-Mode (Modal scheme, mass and number). Mass-based bin scheme used for dust | SO <sub>4</sub> , BC, OM, sea salt in 5 log-normal modes and dust in 6 bins                                                                                                                                                                                                                            | UKCA coupled stratosphere-troposphere interactive photolysis                                                   |
| GFDL-ESM4      | cubed-sphere (c96) grid, with ~100 km native resolution, re-gridded to 1.0° x 1.25°        | L49 (0.01 hPa)                 | Bulk mass-based scheme. 5 size bins used for sea salt and dust.                  | NH <sub>4</sub> , SO <sub>4</sub> , NO <sub>3</sub> , NH <sub>4</sub> , BC, OM, sea salt, dust                                                                                                                                                                                                         | Interactive stratosphere-troposphere                                                                           |
| NorESM2-LM     | 1.9° x 2.5°                                                                                | L32 (3.64 hPa)                 | OsloAero6                                                                        | SO <sub>4</sub> , BC, OM, sea salt, dust (log-normal modes)                                                                                                                                                                                                                                            | Simplified chemistry for use in aerosol scheme. Other fields prescribed.                                       |
| GISS-E2-1-G    | 2° x 2.5°                                                                                  | L40 (0.1 hPa)                  | OMA (one moment aerosol scheme – mass-based)                                     | SO <sub>4</sub> , NO <sub>3</sub> , NH <sub>4</sub> , BC, OM treated as externally mixed with prescribed and constant size distribution. Sea salt has two size classes. Sectional scheme for dust with 5 size bins that can be coated with SO <sub>4</sub> and NO <sub>3</sub> to increase solubility. | Coupled troposphere-stratosphere chemistry scheme. Modified Carbon Bond Mechanism 4 (CBM-4) chemical mechanism |
| MIROC-ES2L     | 2.813° x 2.813°                                                                            | L40 (3.0 hPa)                  | SPRINTAS                                                                         | SO <sub>4</sub> , BC, OM, sea salt, and dust in lognormal size distributions. External mixing assumed for SO <sub>4</sub> , sea salt, and dust aerosols                                                                                                                                                | Simplified chemistry for use with aerosol scheme                                                               |
| MRI-ESM2-0     | MRIAGCM3.5: 1.125° x 1.125°, MASINGAR mk-2r4c: 1.875° x 1.875°, MRICCM2.1: 2.813° x 2.813° | L80 (0.01 hPa)                 | MASINGAR mk2r4c                                                                  | Mass-based scheme with externally mixed size distributions. SO <sub>4</sub> (three categories), BC (hydrophilic and hydrophobic), OM (hydrophilic and hydrophobic), sea salt (10 size bins), and dust (10 size bins).                                                                                  | Chemistry Climate Model version 2.1 (MRICCM2.1) covering troposphere, stratosphere, and mesosphere             |
| CESM2-WACCM    | 0.9° x 1.25°                                                                               | L70 (6 x 10 <sup>-6</sup> hPa) | MAM4 (modal scheme, simulating mass and number concentrations) with VBS-SOA      | SO <sub>4</sub> , BC, OM (both primary and secondary), sea salt, and dust                                                                                                                                                                                                                              | MOZARTTSM1 covering troposphere, stratosphere, mesosphere, and lower thermosphere                              |
| BCC-ESM1       | 2.813° x 2.813°                                                                            | L26 (2.914 hPa)                | Mass-based aerosol scheme. Prescribed stratospheric aerosols.                    | SO <sub>4</sub> , BC (hydrophilic and hydrophobic), OM (hydrophilic and hydrophobic, sea salt (4 size bins), and dust (4 size bins). No nucleation or coagulation of aerosols                                                                                                                          | CAM-Chem (based on MOZART). Tropospheric only chemistry                                                        |
| MPI-ESM1.2-HAM | 1.875° x 1.875°                                                                            | L47 (0.01 hPa)                 | HAM2.3 (Modal scheme, mass and number)                                           | SO <sub>4</sub> , BC, OM, sea salt, and dust in 7 lognormal modes                                                                                                                                                                                                                                      | Simplified sulfur chemistry. Other fields prescribed.                                                          |
